## DISCUSSION

### J. F. Booker

Authors and readers of the present paper may be interested in additional references to similar work carried out in the past at Cornell University. Fisher [12] designed and developed an experimental rig similar to the present one for the study of *circular* squeeze films under periodic loading. Using the same equipment Rodrigues [13] performed a series of experiments and compared the results with a continuity-based cavitation model.

Both theory and experiment were simplified by the circular

<sup>1</sup>Professor, Mechanical and Aerospace Engineering, Cornell University, Ithaca, N.Y. 14853.

geometry, though neither solutions nor results necessarily exhibited polar symmetry throughout the cycle.

### Additional References

12 "The Design and Development of an Electrohydraulic Servomechanism for the Study of Squeeze-Film Cavitation," Fisher, D. K., M.S. thesis, Cornell University, June 1967.

13 Rodrigues, A. N., "An Analysis of Cavitation in a Circular Squeeze Film and Correlation with Experimental Results," Ph.D. thesis, Cornell University, June 1970.

### Authors' Closure

The authors are most grateful to Prof. J. F. Booker for his interest in this work and his very helpful discussion and contribution.
